# Supplementary material for: Risk of tumor lysis syndrome in patients with acute myeloid leukemia treated with venetoclax-containing regimens without dose ramp-up
Source: PubMed Central journal article supplement (PMC7817590; doi:10.1007/s00277-020-04181-5), 2020-07-23
Supplement: 277_2020_4181_MOESM1_ESM.pdf [file 277_2020_4181_MOESM1_ESM.pdf]

## **Risk of Tumor Lysis Syndrome in Patients with Acute Myeloid Leukemia Treated with Venetoclax-containing Regimens without Dose Ramp-up**

### **Supporting information**

#### **Supplementary methods**

##### **Patients and treatment**

All patients had received venetoclax in combination with either hypomethylating agents (HMA), namely azacytidine or decitabine or low dose cytarabine (LDAC). Venetoclax was administered at a dose of 100 mg once daily perorally days 1-14 due to mandatory co-medication with a CYP3A4 inhibitor for fungal prophylaxis or treatment, primarily posaconazole or voriconazole. Four patients received venetoclax 100mg days 1-28. Additionally, patients either received azacytidine (n=27, 75 mg/m<sup>2</sup>/day subcutaneously days 1-7), decitabine (n=12, 20 mg/m<sup>2</sup>/day intravenously days 1-5, two patients received decitabine days 1-10) or low dose cytarabine (n=3, 20 mg/m<sup>2</sup>/day twice daily subcutaneously days 1-10, one patient received cytarabine days 1-7). All patients received supportive care measures including uric acid-reducing agents for tumor lysis syndrome, transfusions, hydration and antiemetic agents.

##### **Efficacy and safety assessment**

The overall response rate was defined as a combination of complete remission (CR), complete remission with incomplete blood count recovery (CRi) and partial remission (PR) according to ELN 2017 criteria [1]. Morphologic leukemia-free state (MLFS) was defined as less than 5% blasts in an aspirate with a count of at least 200 nucleated cells. Patients were considered as refractory if they did not achieve CR, CRi or PR after four cycles of venetoclax treatment. Overall survival (OS) endpoints, measured from the first day of chemotherapy + venetoclax administration, were death (failure)

and alive at last follow-up (censored). Event-free survival (EFS) endpoints, measured from the first day of chemotherapy + venetoclax administration, were refractory disease (failure), relapse (failure), death from any cause (failure) and alive in CR/CRi at last follow-up (censored). Cumulative incidence of relapse (CIR) endpoints, measured from the date of CR/CRi, were relapse (failure), death from any cause (failure) and alive in CR/CRi at last follow-up (censored) [1].

Patients' charts were searched for laboratory data including levels of creatinine, potassium, calcium, phosphate and uric acid as well as physician-assessed adverse events that emerged during treatment beginning from the first day of venetoclax + chemotherapy administration to day 28 after the start of therapy.

### **Statistical analysis**

Safety and efficacy analyses were performed for all patients who received at least one cycle of venetoclax combination treatment. Demographics were analyzed by descriptive statistics. Median follow-up time for survival was calculated with the reverse Kaplan-Meier method. The Kaplan-Meier method and log-rank test were used to estimate the distribution of OS, CIR and EFS. Comparisons between patients with and without tumor lysis syndrome were conducted using the Wilcoxon-Mann-Whitney-Test test for continuous variables and  $\chi^2$  test for categorical variables.

The statistical analyses were performed using Prism software, version 5 (GraphPad Software, Inc., La Jolla, CA, USA), statistical software package SPSS 26.0 (IBM Corporation, Armonk, NY, USA) and Microsoft Excel 2013 (Microsoft Corporation, Redmond, WA, USA).

**Supplementary Table S1A. Definition of laboratory tumor lysis syndrome according to Cairo and Bishop [2].**

|           |                                                              |
|-----------|--------------------------------------------------------------|
| Potassium | $\geq 6.0$ mmol/L or $\geq 25\%$ increase from baseline      |
| Calcium   | $\leq 1.75$ mmol/L or $\geq 25\%$ decrease from baseline     |
| Phosphate | $\geq 1.45$ mmol/L or $\geq 25\%$ increase from baseline     |
| Uric acid | $\geq 476$ $\mu$ mol/L or $\geq 25\%$ increase from baseline |

Laboratory tumor lysis syndrome (LTLS) is defined as either a  $\geq 25\%$  change from baseline or level above or below normal, as defined above, for any two or more serum values of potassium, calcium, phosphate, and uric acid within 3 days before or 7 days after the initiation of chemotherapy.

**Supplementary Table S1B. Definition of clinical tumor lysis syndrome according to Cairo and Bishop [2].**

|                                 |                                                              |
|---------------------------------|--------------------------------------------------------------|
| Creatinine                      | $\geq 1.5$ fold ULN*                                         |
| Cardiac arrhythmia/sudden death | Not directly or probably attributable to a therapeutic agent |
| Seizure                         | Not directly or probably attributable to a therapeutic agent |

\* Creatinine levels: patients will be considered to have elevated creatinine if their serum creatinine is 1.5 fold greater than the institutional upper limit of normal (ULN). Clinical tumor lysis syndrome (CTLS) is defined as the presence of LTLS and any one or more of the above-mentioned criteria. ULN, upper limit of normal.

**Supplementary Table S2. Response and outcome analysis in AML patients with and without TLS.**

|                                          | <b>Without TLS<br/>(n=37)</b> | <b>With TLS<br/>(n=5)</b> | <b>P</b> |
|------------------------------------------|-------------------------------|---------------------------|----------|
| Best response <i>n</i> (%)               |                               |                           | 0.77     |
| ORR (CR, CRi)                            | 16 (44)                       | 3 (60)                    |          |
| CR/CRi                                   | 16 (44)                       | 3 (60)                    |          |
| MLFS                                     | 3                             | -                         |          |
| SD/RD/PD                                 | 11 (30)                       | 2 (40)                    |          |
| Death before assessment                  | 6 (16)                        | -                         |          |
| Pending                                  | 1 (3)                         | -                         |          |
| Follow-up (months)                       |                               |                           |          |
| Median                                   | 13.5                          | 13.8                      |          |
| Event-free survival (months)             |                               |                           | 0.63     |
| Median (95% CI)                          | 4.3 (1.1-7.3)                 | 6.7 (1.9-11.6)            |          |
| Cumulative incidence of relapse (months) |                               |                           | 0.41     |
| Median (95% CI)                          | 8.0 (5.4-10.6)                | 4.5 (1.3-7.7)             |          |
| Overall survival (months)                |                               |                           | 0.058    |
| Median (95% CI)                          | 5.3 (2.3-8.4)                 | NR                        |          |

Data are *n* (%) or median (95% CI) unless otherwise indicated. Patients with stable disease or progressive disease were considered non-responders. ORR, overall response rate; CR, complete remission; CRi, complete remission with incomplete hematologic recovery; MLFS, morphologically leukemia free state; SD, stable disease; RD, refractory disease; PD, progressive disease; CI, confidence interval; NR, not reached.

**Supplementary Figures****Figure S1. Survival analysis of AML patients with and without TLS.**

(A) Event-free survival of patients with TLS (n=5, blue line) and without TLS (n=37, orange line).

(B) Cumulative incidence of relapse of CR/CRi patients with TLS (n=3, blue line) and without TLS (n=16, orange line).

(C) Overall survival of patients with TLS (n=5, blue line) and without TLS (n=37, orange line).

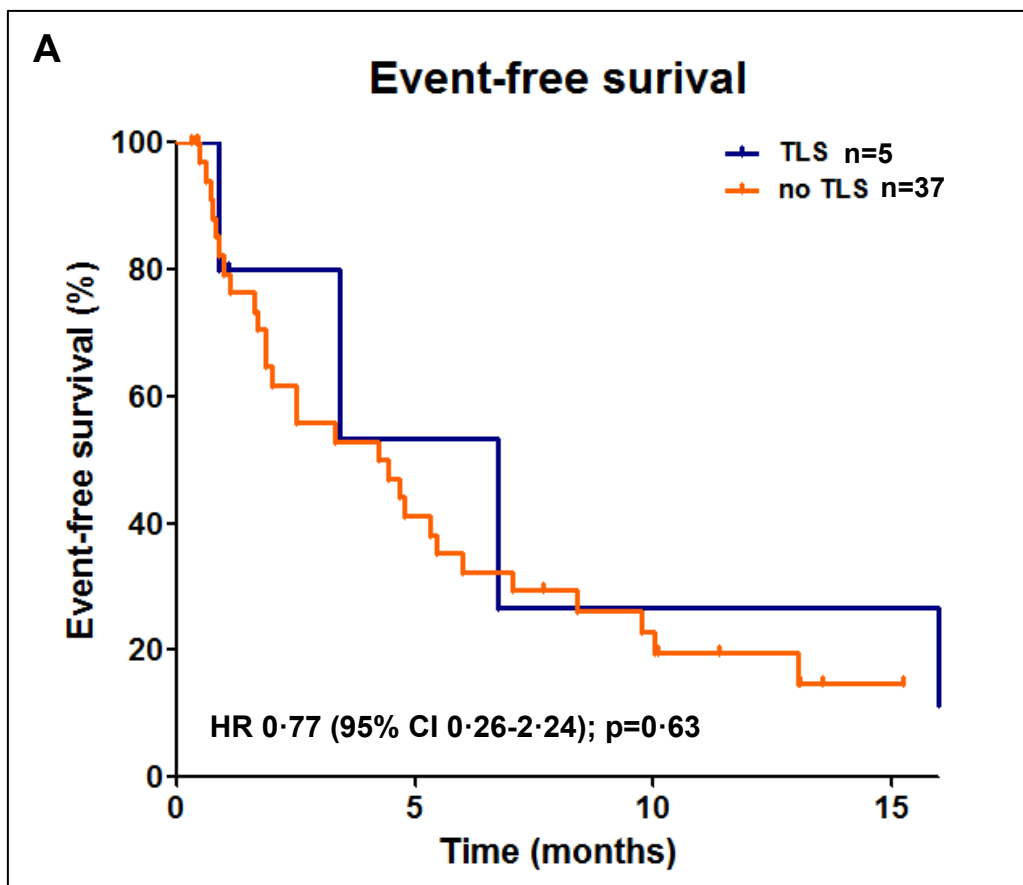

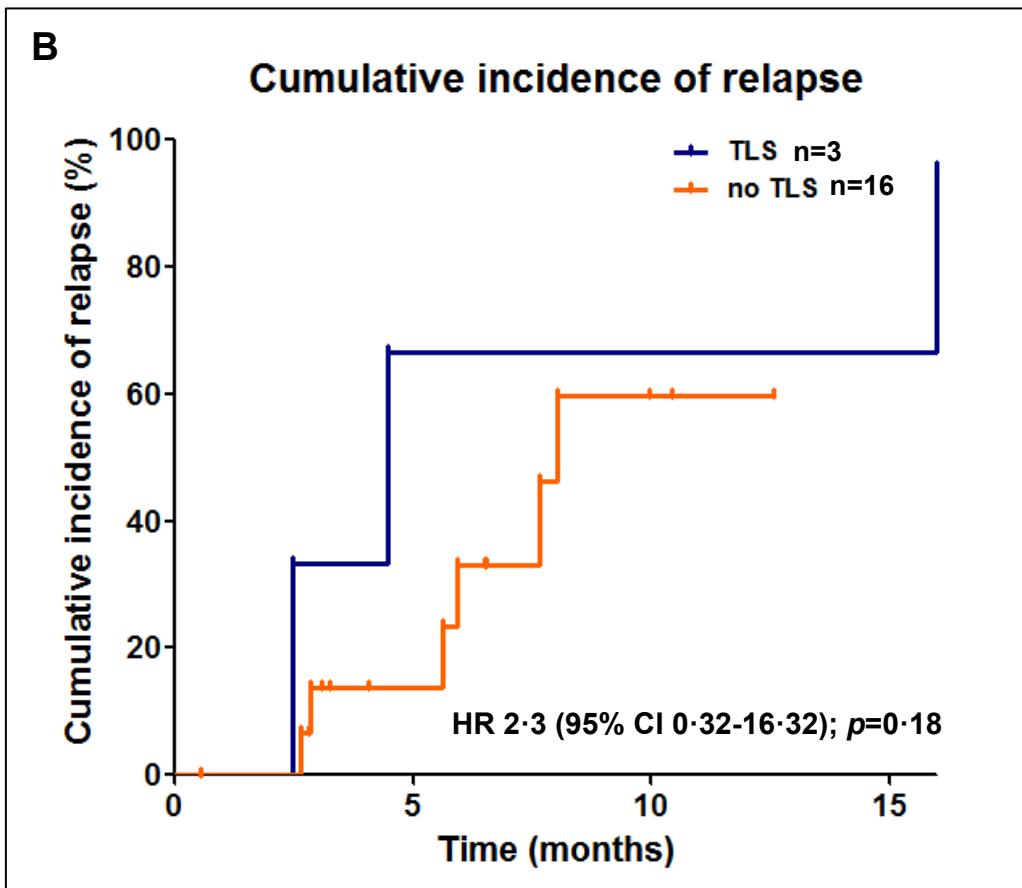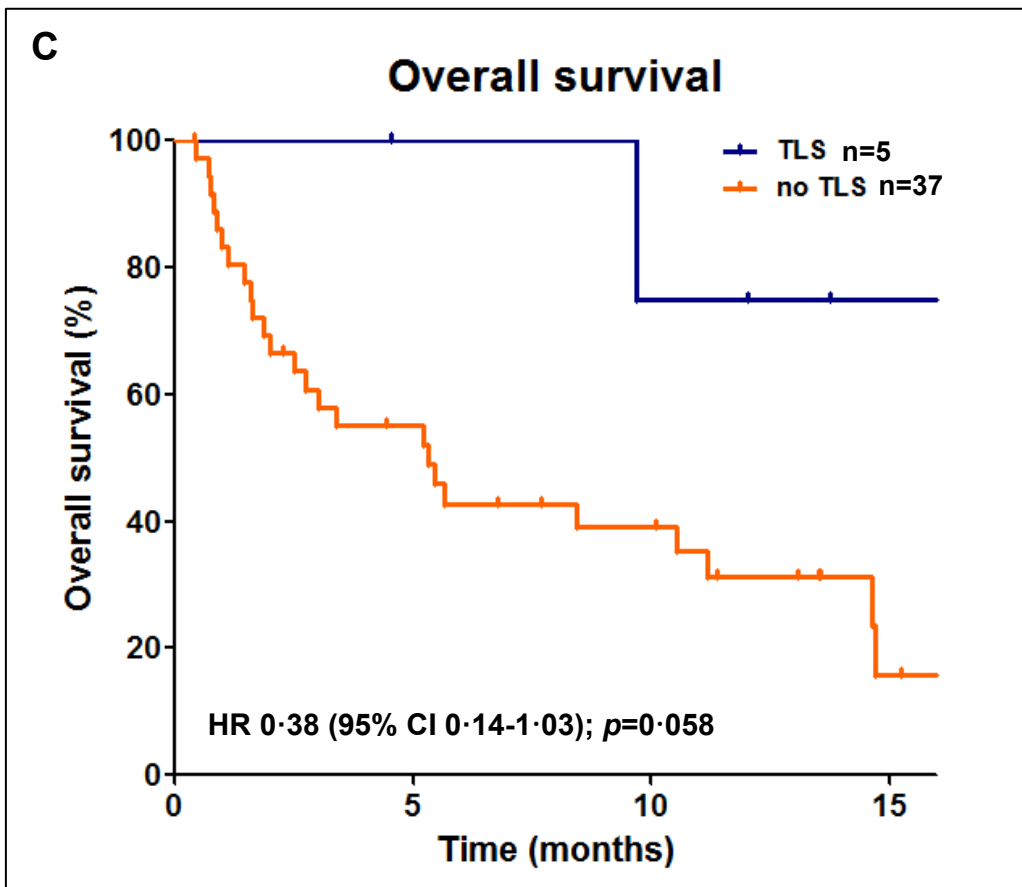

## References

1. Döhner H et al (2017) Diagnosis and management of AML in adults: 2017 ELN recommendations from an international expert panel. *Blood* 129(4):424–447. <https://doi:10.1182/blood-2016-08-733196>
2. Cairo MS, Bishop M (2004) Tumour lysis syndrome: new therapeutic strategies and classification. *Br J Haematol* 127:3-11. <https://doi:10.1111/j.1365-2141.2004.05094.x>
